# Supplementary material for: A RanGTP-independent mechanism allows ribosomal protein nuclear import for ribosome assembly
Source: eLife. 2014 Aug 21;3:e03473. doi: 10.7554/eLife.03473 (PMC4161973; doi:10.7554/eLife.03473)
Supplement: Supplementary file 2. — Peptides used for SRM assays. DOI: http://dx.doi.org/10.7554/eLife.03473.017 [file elife03473s002.xlsx]

## Sheet: SRM assays
Supplementary File 2
Peptides used for SRM assays
Protein	Peptide	Precursor Mz	Product Mz	Precursor Charge	Product Charge	Fragment Ion	iRT	CollisionEnergy
RTpeptides	ADVTPADFSEWSK	726.836	1066.48	2	1	y9	54.97	23.9
RTpeptides	ADVTPADFSEWSK	726.836	533.746	2	2	y9	54.97	23.9
RTpeptides	DGLDAASYYAPVR	699.338	926.473	2	1	y8	43.28	22.9
RTpeptides	DGLDAASYYAPVR	699.338	855.436	2	1	y7	43.28	22.9
RTpeptides	GAGSSEPVTGLDAK	644.823	800.451	2	1	y8	0.23	21.1
RTpeptides	GAGSSEPVTGLDAK	644.823	604.33	2	1	y6	0.23	21.1
RTpeptides	GTFIIDPAAVIR	636.869	854.509	2	1	y8	86.72	20.8
RTpeptides	GTFIIDPAAVIR	636.869	626.398	2	1	y6	86.72	20.8
RTpeptides	GTFIIDPGGVIR	622.854	713.394	2	1	y7	71.38	20.3
RTpeptides	GTFIIDPGGVIR	622.854	598.367	2	1	y6	71.38	20.3
RTpeptides	LFLQFGAQGSPFLK	776.93	1051.56	2	1	y10	98.09	25.6
RTpeptides	LFLQFGAQGSPFLK	776.93	904.489	2	1	y9	98.09	25.6
RTpeptides	LGGNEQVTR	487.257	860.422	2	1	y8	-28.31	15.7
RTpeptides	LGGNEQVTR	487.257	503.294	2	1	y4	-28.31	15.7
RTpeptides	TPVISGGPYEYR	669.838	1041.5	2	1	y9	29	21.9
RTpeptides	TPVISGGPYEYR	669.838	928.416	2	1	y8	29	21.9
RTpeptides	TPVITGAPYEYR	683.854	956.447	2	1	y8	33.63	22.4
RTpeptides	TPVITGAPYEYR	683.854	855.4	2	1	y7	33.63	22.4
RTpeptides	VEATFGVDESNAK	683.828	819.388	2	1	b8	13.11	22.4
RTpeptides	VEATFGVDESNAK	683.828	966.453	2	1	y9	13.11	22.4
RTpeptides	YILAGVENSK	547.298	817.441	2	1	y8	22.38	17.8
RTpeptides	YILAGVENSK	547.298	633.32	2	1	y6	22.38	17.8
RPS1	VSGFKDEVLETV	661.846	763.362	2	1	b7	54.83	21.7
RPS1	VSGFKDEVLETV	661.846	862.431	2	1	b8	54.83	21.7
RPS1	VSGFKDEVLETV	661.846	975.515	2	1	b9	54.83	21.7
RPS1	VSGFKDEVLETV	661.846	1104.56	2	1	b10	54.83	21.7
RPS1	VSGFKDEVLETV	661.846	552.782	2	2	b10	54.83	21.7
RPS1	VSGFKDEVLETV	661.846	603.306	2	2	b11	54.83	21.7
RPS1	VISEILTR	465.785	831.493	2	1	y7	26.51	15
RPS1	VISEILTR	465.785	718.409	2	1	y6	26.51	15
RPS1	VISEILTR	465.785	631.377	2	1	y5	26.51	15
RPS1	VISEILTR	465.785	502.335	2	1	y4	26.51	15
RPS1	VISEILTR	465.785	389.251	2	1	y3	26.51	15
RPS1	VISEILTR	465.785	300.192	2	1	b3	26.51	15
RPS1	VISEILTK	451.781	803.487	2	1	y7	21.62	14.5
RPS1	VISEILTK	451.781	690.403	2	1	y6	21.62	14.5
RPS1	VISEILTK	451.781	603.371	2	1	y5	21.62	14.5
RPS1	VISEILTK	451.781	474.329	2	1	y4	21.62	14.5
RPS1	VISEILTK	451.781	361.245	2	1	y3	21.62	14.5
RPS1	VISEILTK	451.781	302.189	2	2	y5	21.62	14.5
RPS1	LIPEVINKEIENATK	570.993	1046.55	3	1	y9	66.01	18.5
RPS1	LIPEVINKEIENATK	570.993	804.41	3	1	y7	66.01	18.5
RPS1	LIPEVINKEIENATK	570.993	675.367	3	1	y6	66.01	18.5
RPS1	LIPEVINKEIENATK	570.993	562.283	3	1	y5	66.01	18.5
RPS1	LIPEVINKEIENATK	570.993	629.854	3	2	y11	66.01	18.5
RPS1	EVQNSTLAQLTSK	709.878	1062.58	2	1	y10	28.76	23.3
RPS1	EVQNSTLAQLTSK	709.878	948.536	2	1	y9	28.76	23.3
RPS1	EVQNSTLAQLTSK	709.878	861.504	2	1	y8	28.76	23.3
RPS1	EVQNSTLAQLTSK	709.878	760.456	2	1	y7	28.76	23.3
RPS1	EVQNSTLAQLTSK	709.878	647.372	2	1	y6	28.76	23.3
RPS1	EVQNSTLAQLTSK	709.878	335.193	2	1	y3	28.76	23.3
RPS1	EVQGSTLAQLTSK	681.367	1005.56	2	1	y10	27.25	22.3
RPS1	EVQGSTLAQLTSK	681.367	861.504	2	1	y8	27.25	22.3
RPS1	EVQGSTLAQLTSK	681.367	760.456	2	1	y7	27.25	22.3
RPS1	EVQGSTLAQLTSK	681.367	647.372	2	1	y6	27.25	22.3
RPS1	EVQGSTLAQLTSK	681.367	576.335	2	1	y5	27.25	22.3
RPS1	EVQGSTLAQLTSK	681.367	335.193	2	1	y3	27.25	22.3
RPS1	FDVGALMALHGEGSGEEK	616.293	929.396	3	1	y9	68.12	19.5
RPS1	FDVGALMALHGEGSGEEK	616.293	792.337	3	1	y8	68.12	19.5
RPS1	FDVGALMALHGEGSGEEK	616.293	792.888	3	2	y16	68.12	19.5
RPS1	FDVGALMALHGEGSGEEK	616.293	743.354	3	2	y15	68.12	19.5
RPS1	FDVGALMALHGEGSGEEK	616.293	679.324	3	2	y13	68.12	19.5
RPS1	FDVGALMALHGEGSGEEK	616.293	622.782	3	2	y12	68.12	19.5
RPS1	NLLTNFHGMDFTTDKLR	675.007	1183.58	3	1	y10	73.16	20.8
RPS1	NLLTNFHGMDFTTDKLR	675.007	880.489	3	1	y7	73.16	20.8
RPS1	NLLTNFHGMDFTTDKLR	675.007	416.298	3	1	y3	73.16	20.8
RPS1	NLLTNFHGMDFTTDKLR	675.007	841.901	3	2	y14	73.16	20.8
RPS1	NLLTNFHGMDFTTDKLR	675.007	791.378	3	2	y13	73.16	20.8
RPS1	NLLTNFHGMDFTTDKLR	675.007	660.822	3	2	y11	73.16	20.8
RPS1	FDVGALMALHGEGSGEEKGK	677.998	1114.51	3	1	y11	59.13	20.9
RPS1	FDVGALMALHGEGSGEEKGK	677.998	977.453	3	1	y10	59.13	20.9
RPS1	FDVGALMALHGEGSGEEKGK	677.998	885.446	3	2	y18	59.13	20.9
RPS1	FDVGALMALHGEGSGEEKGK	677.998	835.912	3	2	y17	59.13	20.9
RPS1	FDVGALMALHGEGSGEEKGK	677.998	771.883	3	2	y15	59.13	20.9
RPS1	FDVGALMALHGEGSGEEKGK	677.998	715.341	3	2	y14	59.13	20.9
RPS14	IGRIEDVTPVPSDSTR	581.307	858.432	3	1	y8	20.51	18.7
RPS14	IGRIEDVTPVPSDSTR	581.307	662.31	3	1	y6	20.51	18.7
RPS14	IGRIEDVTPVPSDSTR	581.307	363.199	3	1	y3	20.51	18.7
RPS14	IGRIEDVTPVPSDSTR	581.307	331.659	3	2	y6	20.51	18.7
RPS14	IGRIEDVTPVPSDSTR	581.307	684.368	3	1	b6	20.51	18.7
RPS14	IGRIEDVTPVPSDSTR	581.307	884.484	3	1	b8	20.51	18.7
RPS14	IEDVTPVPSDSTR	708.354	959.479	2	1	y9	8.84	23.2
RPS14	IEDVTPVPSDSTR	708.354	858.432	2	1	y8	8.84	23.2
RPS14	IEDVTPVPSDSTR	708.354	662.31	2	1	y6	8.84	23.2
RPS14	IEDVTPVPSDSTR	708.354	363.199	2	1	y3	8.84	23.2
RPS14	IEDVTPVPSDSTR	708.354	358.161	2	1	b3	8.84	23.2
RPS14	IEDVTPVPSDSTR	708.354	558.277	2	1	b5	8.84	23.2
RPS14	DNSQVFGVAR	546.775	863.473	2	1	y8	15.62	17.7
RPS14	DNSQVFGVAR	546.775	776.441	2	1	y7	15.62	17.7
RPS14	DNSQVFGVAR	546.775	648.383	2	1	y6	15.62	17.7
RPS14	DNSQVFGVAR	546.775	549.314	2	1	y5	15.62	17.7
RPS14	DNSQVFGVAR	546.775	402.246	2	1	y4	15.62	17.7
RPS14	DNSQVFGVAR	546.775	544.236	2	1	b5	15.62	17.7
RPS14	TKTPGPGGQAALR	418.57	672.379	3	1	y7	-18.61	15.2
RPS14	TKTPGPGGQAALR	418.57	615.357	3	1	y6	-18.61	15.2
RPS14	TKTPGPGGQAALR	418.57	430.277	3	1	y4	-18.61	15.2
RPS14	TKTPGPGGQAALR	418.57	359.24	3	1	y3	-18.61	15.2
RPS14	TKTPGPGGQAALR	418.57	512.78	3	2	y11	-18.61	15.2
RPS14	TKTPGPGGQAALR	418.57	462.257	3	2	y10	-18.61	15.2
RPS14	ADRDESSPYAAMLAAQDVAAK	727.348	886.499	3	1	y9	55.74	22
RPS14	ADRDESSPYAAMLAAQDVAAK	727.348	773.415	3	1	y8	55.74	22
RPS14	ADRDESSPYAAMLAAQDVAAK	727.348	702.378	3	1	y7	55.74	22
RPS14	ADRDESSPYAAMLAAQDVAAK	727.348	761.306	3	1	b7	55.74	22
RPS14	ADRDESSPYAAMLAAQDVAAK	727.348	1163.5	3	1	b11	55.74	22
RPS14	ADRDESSPYAAMLAAQDVAAK	727.348	582.252	3	2	b11	55.74	22
RPS26	NIVEAAAVR	471.772	715.41	2	1	y7	7.14	15.2
RPS26	NIVEAAAVR	471.772	616.341	2	1	y6	7.14	15.2
RPS26	NIVEAAAVR	471.772	487.299	2	1	y5	7.14	15.2
RPS26	NIVEAAAVR	471.772	416.262	2	1	y4	7.14	15.2
RPS26	NIVEAAAVR	471.772	327.203	2	1	b3	7.14	15.2
RPS26	NIVEAAAVR	471.772	598.32	2	1	b6	7.14	15.2
RPS26	LHYCVSCAIHAR	496.24	814.399	3	1	y7	8.58	16.9
RPS26	LHYCVSCAIHAR	496.24	567.336	3	1	y5	8.58	16.9
RPS26	LHYCVSCAIHAR	496.24	383.215	3	1	y3	8.58	16.9
RPS26	LHYCVSCAIHAR	496.24	618.784	3	2	y10	8.58	16.9
RPS26	DLSEASVYPEYALPK	841.42	1237.65	2	1	y11	62.56	27.8
RPS26	DLSEASVYPEYALPK	841.42	1166.61	2	1	y10	62.56	27.8
RPS26	DLSEASVYPEYALPK	841.42	1079.58	2	1	y9	62.56	27.8
RPS26	DLSEASVYPEYALPK	841.42	980.509	2	1	y8	62.56	27.8
RPS26	DLSEASVYPEYALPK	841.42	817.445	2	1	y7	62.56	27.8
RPS26	DLSEASVYPEYALPK	841.42	683.848	2	2	y12	62.56	27.8
RPS28	VEFLEDTSR	548.269	867.421	2	1	y7	23.91	17.8
RPS28	VEFLEDTSR	548.269	720.352	2	1	y6	23.91	17.8
RPS28	VEFLEDTSR	548.269	607.268	2	1	y5	23.91	17.8
RPS28	VEFLEDTSR	548.269	478.226	2	1	y4	23.91	17.8
RPS28	VEFLEDTSR	548.269	363.199	2	1	y3	23.91	17.8
RPS28	VEFLEDTSR	548.269	376.187	2	1	b3	23.91	17.8
RPS28	GPVRENDILVLMESER	619.656	863.429	3	1	y7	74.48	19.6
RPS28	GPVRENDILVLMESER	619.656	764.361	3	1	y6	74.48	19.6
RPS28	GPVRENDILVLMESER	619.656	651.277	3	1	y5	74.48	19.6
RPS28	GPVRENDILVLMESER	619.656	768.363	3	1	b7	74.48	19.6
RPS28	GPVRENDILVLMESER	619.656	881.448	3	1	b8	74.48	19.6
RPS28	GPVRENDILVLMESER	619.656	994.532	3	1	b9	74.48	19.6
RPS28	GGVTQVRVEFLEDTSR	598.311	607.268	3	1	y5	51.2	19.1
RPS28	GGVTQVRVEFLEDTSR	598.311	478.226	3	1	y4	51.2	19.1
RPS28	GGVTQVRVEFLEDTSR	598.311	363.199	3	1	y3	51.2	19.1
RPS28	GGVTQVRVEFLEDTSR	598.311	790.407	3	2	y13	51.2	19.1
RPS28	GGVTQVRVEFLEDTSR	598.311	739.884	3	2	y12	51.2	19.1
RPS28	GGVTQVRVEFLEDTSR	598.311	675.854	3	2	y11	51.2	19.1
RPS28	ENDILVLMESEREAR	601.968	780.906	3	2	y13	70.8	19.2
RPS28	ENDILVLMESEREAR	601.968	723.393	3	2	y12	70.8	19.2
RPS28	ENDILVLMESEREAR	601.968	666.851	3	2	y11	70.8	19.2
RPS28	ENDILVLMESEREAR	601.968	610.309	3	2	y10	70.8	19.2
RPS28	ENDILVLMESEREAR	601.968	560.774	3	2	y9	70.8	19.2
RPS28	ENDILVLMESEREAR	601.968	504.232	3	2	y8	70.8	19.2
RPS28	ENDILVLMESER	724.358	863.429	2	1	y7	83.08	23.8
RPS28	ENDILVLMESER	724.358	764.361	2	1	y6	83.08	23.8
RPS28	ENDILVLMESER	724.358	651.277	2	1	y5	83.08	23.8
RPS28	ENDILVLMESER	724.358	359.12	2	1	b3	83.08	23.8
RPS28	ENDILVLMESER	724.358	472.204	2	1	b4	83.08	23.8
RPS28	TPVTLAK	365.229	628.403	2	1	y6	-14.53	11.6
RPS28	TPVTLAK	365.229	531.35	2	1	y5	-14.53	11.6
RPS28	TPVTLAK	365.229	432.282	2	1	y4	-14.53	11.6
RPS28	TPVTLAK	365.229	331.234	2	1	y3	-14.53	11.6
RPS28	TPVTLAK	365.229	314.705	2	2	y6	-14.53	11.6
RPS28	TPVTLAK	365.229	583.345	2	1	b6	-14.53	11.6
RPS5	VNQAIALLTIGAR	670.406	998.636	2	1	y10	77.18	21.9
RPS5	VNQAIALLTIGAR	670.406	927.599	2	1	y9	77.18	21.9
RPS5	VNQAIALLTIGAR	670.406	814.515	2	1	y8	77.18	21.9
RPS5	VNQAIALLTIGAR	670.406	743.477	2	1	y7	77.18	21.9
RPS5	VNQAIALLTIGAR	670.406	630.393	2	1	y6	77.18	21.9
RPS5	VNQAIALLTIGAR	670.406	517.309	2	1	y5	77.18	21.9
RPS5	TIAETLAEELINAAK	793.935	1172.65	2	1	y11	122.46	26.1
RPS5	TIAETLAEELINAAK	793.935	1071.6	2	1	y10	122.46	26.1
RPS5	TIAETLAEELINAAK	793.935	958.52	2	1	y9	122.46	26.1
RPS5	TIAETLAEELINAAK	793.935	887.483	2	1	y8	122.46	26.1
RPS5	TIAETLAEELINAAK	793.935	403.23	2	1	y4	122.46	26.1
RPS5	DASLVDYVQVR	632.83	878.473	2	1	y7	56.79	20.7
RPS5	DASLVDYVQVR	632.83	779.405	2	1	y6	56.79	20.7
RPS5	DASLVDYVQVR	632.83	664.378	2	1	y5	56.79	20.7
RPS5	DASLVDYVQVR	632.83	501.314	2	1	y4	56.79	20.7
RPS5	DASLVDYVQVR	632.83	387.187	2	1	b4	56.79	20.7
RPS5	DASLVDYVQVR	632.83	486.256	2	1	b5	56.79	20.7
RPS5	AQCPIIER	493.758	787.413	2	1	y6	-3.76	15.9
RPS5	AQCPIIER	493.758	627.382	2	1	y5	-3.76	15.9
RPS5	AQCPIIER	493.758	530.33	2	1	y4	-3.76	15.9
RPS5	AQCPIIER	493.758	417.246	2	1	y3	-3.76	15.9
RPS5	AQCPIIER	493.758	394.21	2	2	y6	-3.76	15.9
RPS5	AQCPIIER	493.758	360.134	2	1	b3	-3.76	15.9
RPS5	QPIFVAHTAGR	399.556	612.321	3	1	y6	2.19	14.7
RPS5	QPIFVAHTAGR	399.556	404.225	3	1	y4	2.19	14.7
RPS5	QPIFVAHTAGR	399.556	486.275	3	2	y9	2.19	14.7
RPS5	QPIFVAHTAGR	399.556	429.733	3	2	y8	2.19	14.7
RPS5	QPIFVAHTAGR	399.556	356.198	3	2	y7	2.19	14.7
RPS5	QPIFVAHTAGR	399.556	306.664	3	2	y6	2.19	14.7
RPS5	LTNSLMMNGR	568.781	416.214	2	1	b4	16.37	18.5
RPS5	LTNSLMMNGR	568.781	529.298	2	1	b5	16.37	18.5
RPS5	LTNSLMMNGR	568.781	660.339	2	1	b6	16.37	18.5
RPS5	LTNSLMMNGR	568.781	905.422	2	1	b8	16.37	18.5
RPS5	LTNSLMMNGR	568.781	453.215	2	2	b8	16.37	18.5
